# Supplementary material for: NSD2 overexpression drives clustered chromatin and transcriptional changes in a subset of insulated domains
Source: PubMed Central journal article supplement (PMC6813313; doi:10.1038/s41467-019-12811-4), 2019-10-24
Supplement: 41467_2019_12811_MOESM3_ESM.pdf [file 41467_2019_12811_MOESM3_ESM.pdf]

## Description of Additional Supplementary Files

File Name: Supplementary Data 1

Description: Differentially expressed genes. Excel table showing for each gene, the output from DESeq2 analysis. Log<sub>2</sub>FC and -log<sub>10</sub>(FDR) are shown in the volcano plot in Fig. 1b.

File Name: Supplementary Data 2

Description: Differential H3K27ac peaks. Excel table showing for each H3K27ac peak, the output from DESeq2 analysis. Log<sub>2</sub>FC and -log<sub>10</sub>(FDR) are shown in the volcano plot in Fig. 1c.

File Name: Supplementary Data 3

Description: Differential CTCF peaks. Excel table showing for each CTCF peak, the output from DESeq2 analysis. Log<sub>2</sub>FC and -log<sub>10</sub>(FDR) are shown in the volcano plot in Fig. 2a.

File Name: Supplementary Data 4

Description: Logistic regression model matrix. Data frame showing for each gene, the output from the logistic regression model shown in Fig. 7a.
